# Supplementary material
Source: PubMed Central journal article supplement (PMC3322498)
Supplement: epi0506_0527SD1.pdf [file epi0506_0527SD1.pdf]

Specific hypermethylation

### mouse Lhx2 - Allen Brain Atlas data

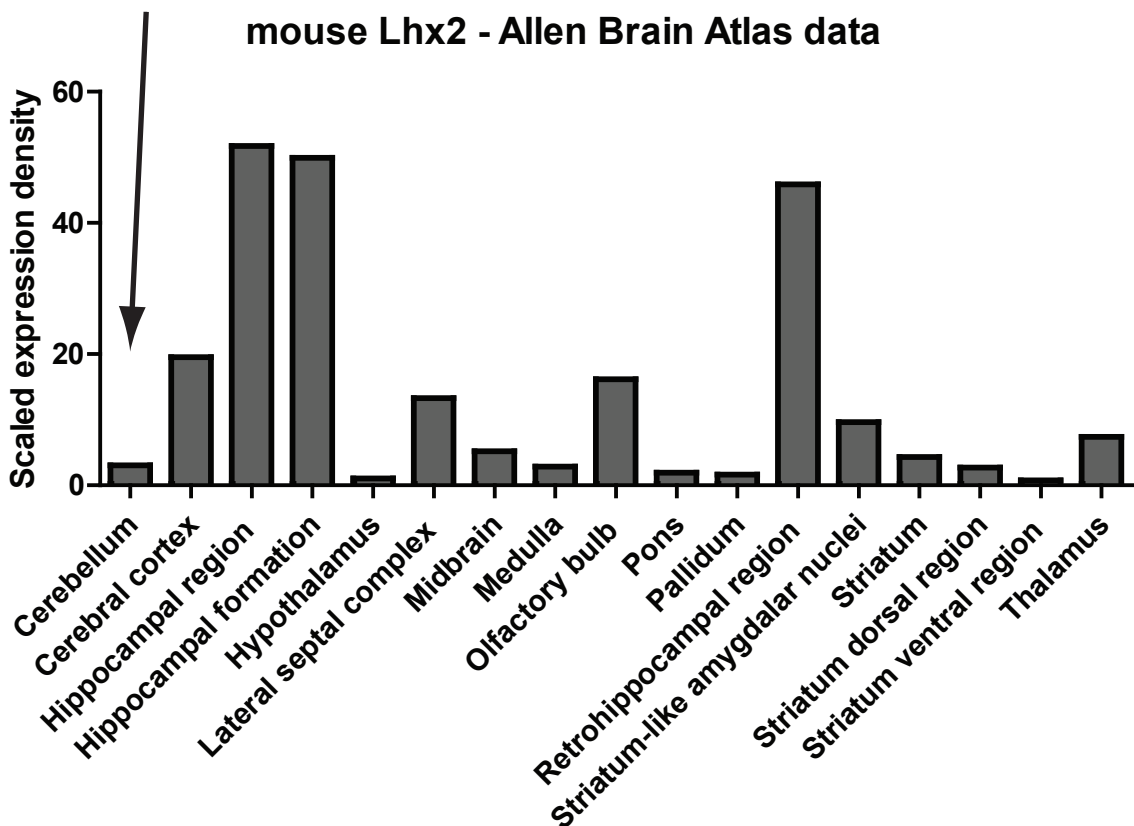

Specific hypomethylation

### mouse Cnpy1 - Allen Brain Atlas data

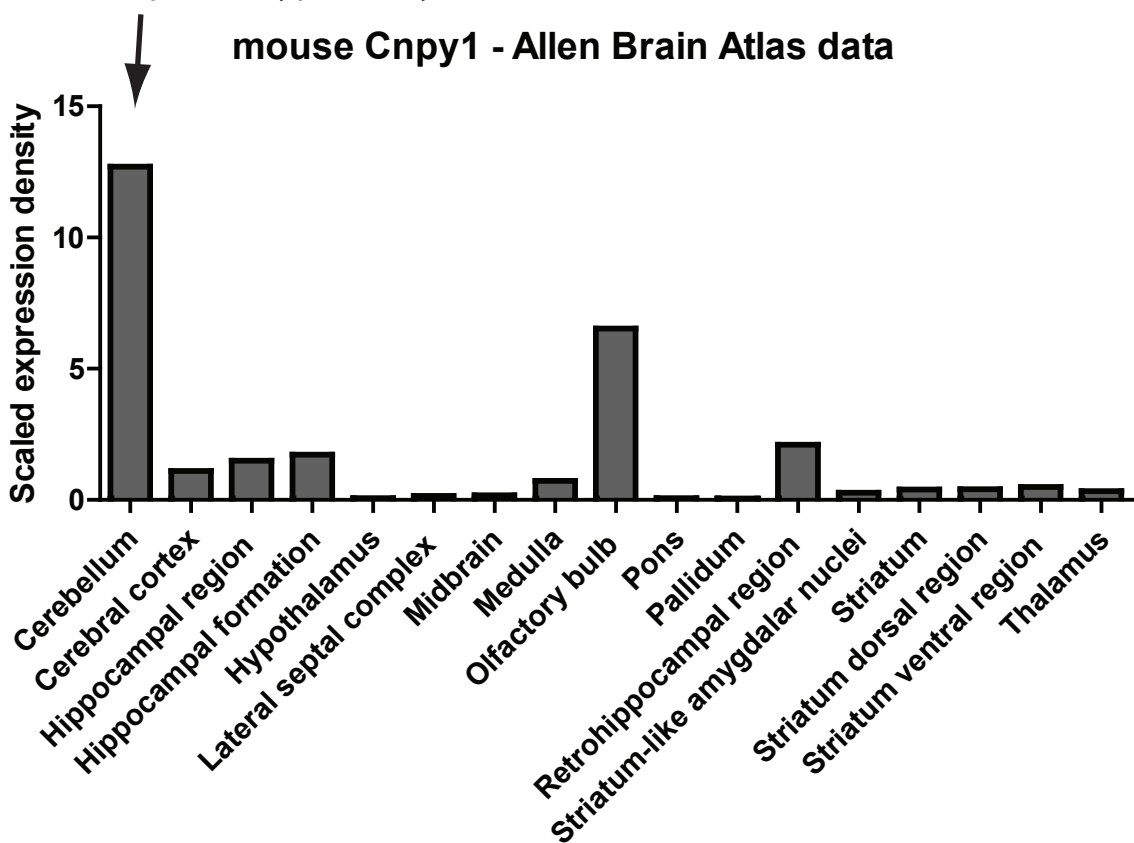

# Mouse Cnpy1

# Mouse Lhx2

# Human LHX2

1456127\_at

1418317\_at

206140\_at

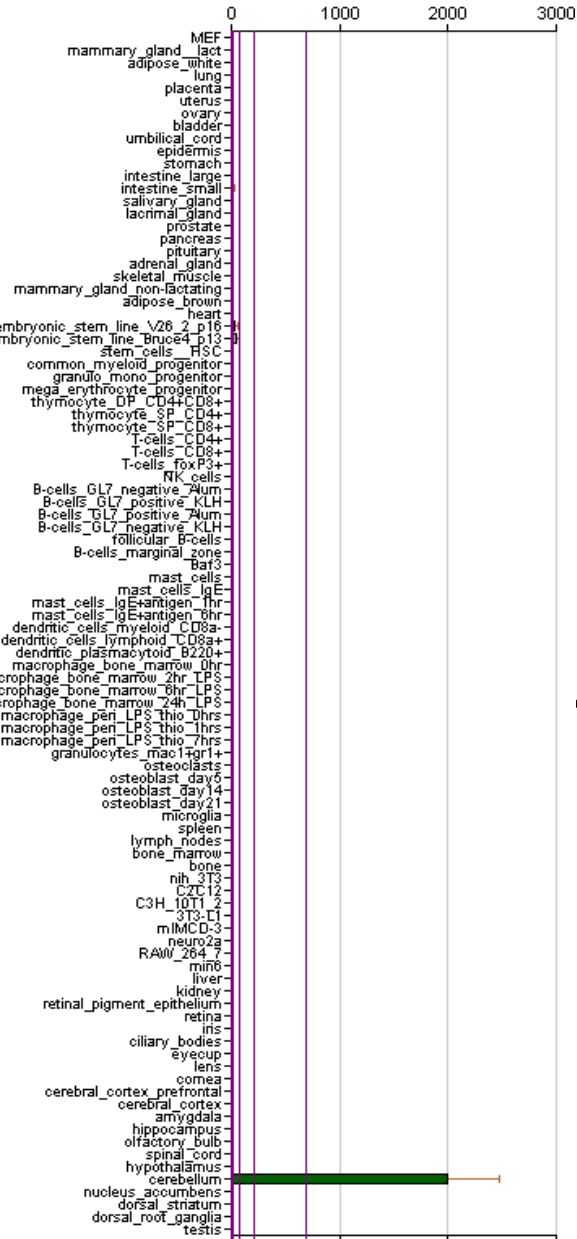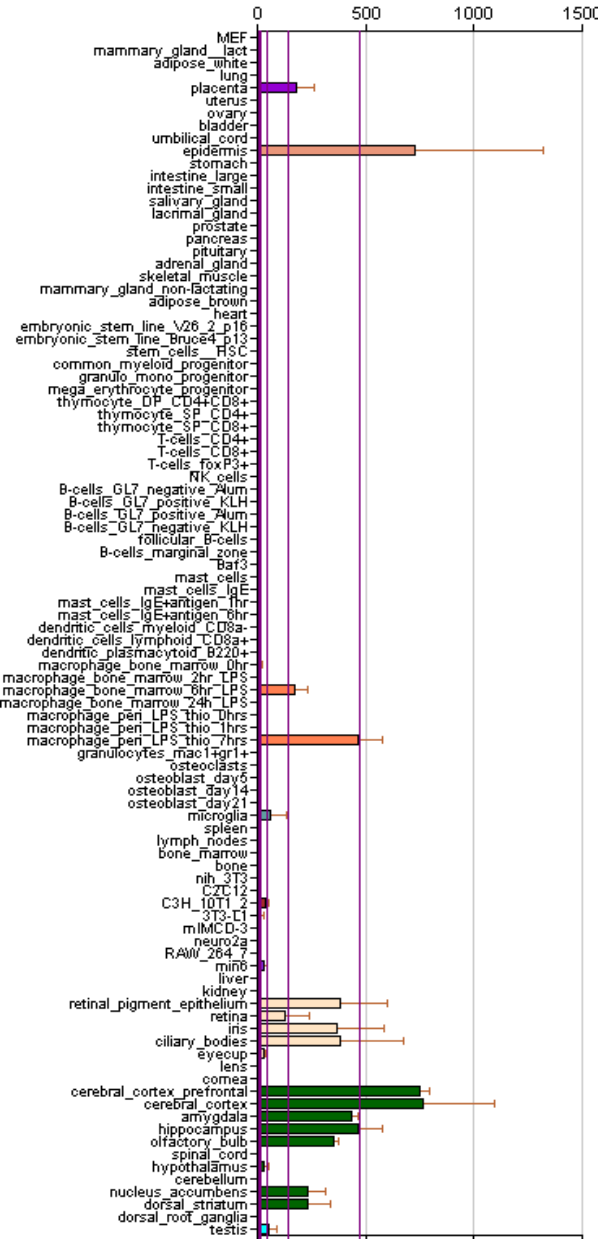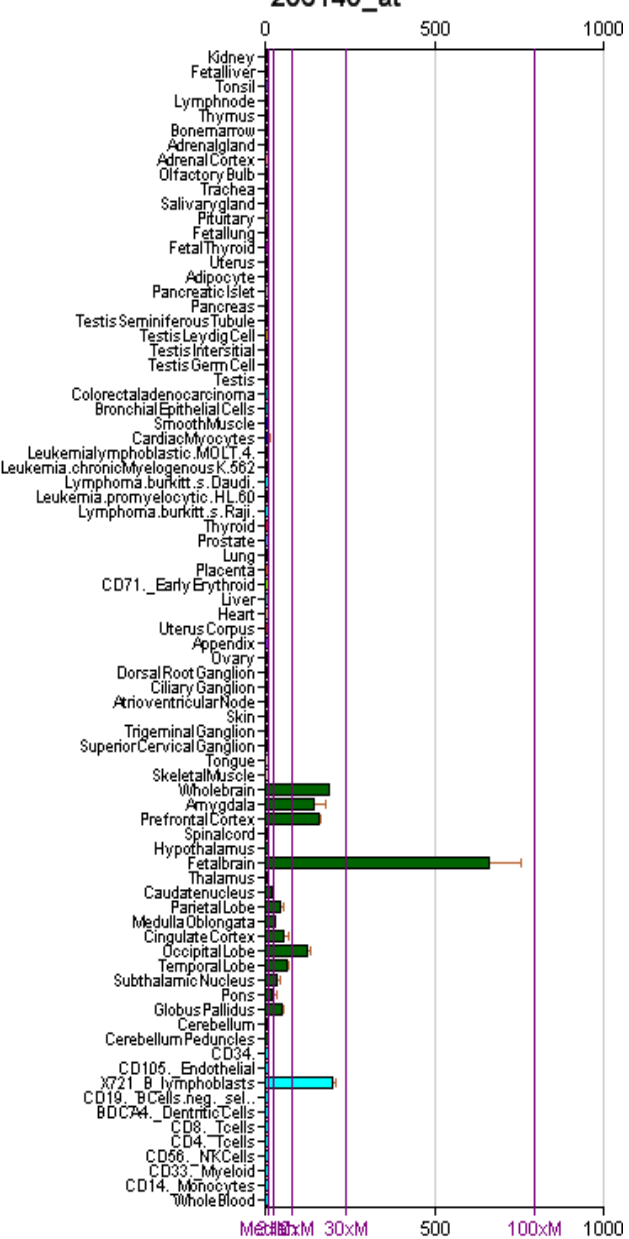

MetExpM 30xM 500 100xM 1000
